# Supplementary material
Source: Elsevier journal article supplement (https://www.sciencedirect.com/science/article/pii/S0021755720302114)
Supplement: mmc1 [file S0021755720302114:mmc1.docx]

**Supplemental Digital Contents**

***Supplemental Digital Content 1***. Pre-operative and post-operative virtual avatars (case №3) on DIVA.

***Supplemental Digital Content 2***. Pre-operative virtual avatar (case №3) on DIVA with implementation of 2D sections and the cutting tool.

***Supplemental Digital Content 3***.Post-operative virtual avatar (case №3) on DIVA with implementation of 2D sections and the cutting tool.

***Supplemental Digital Content 4***. 3D distribution of anatomical landmarks placed by the 4 evaluators on a post-operative virtual avatar (case №3).
